# Supplementary material
Source: publisher figshare collection journal article supplement (https://acs.figshare.com/ndownloader/files/15620117)
Supplement: Supplementary file 1 [file 15620117]

## – Supporting Information –

# Selective Hydrogen Evolution on Manganese Oxide Coated Electrodes: New Cathodes for Sodium Chlorate Production

*Balázs Endrődi<sup>a,b,\*</sup>, Aleksandra Stojanovic<sup>a</sup>, Maria Cuartero<sup>c</sup>, Nina Simic<sup>d</sup>, Mats Wildlock<sup>d</sup>,  
Roland de Marco<sup>e,f</sup>, Gaston A. Crespo<sup>c</sup> and Ann Cornell<sup>a,\*</sup>*

<sup>a</sup>Applied Electrochemistry, School of Engineering Sciences in Chemistry, Biotechnology and Health, KTH Royal Institute of Technology, Teknikringen 42, SE 100-44 Stockholm, Sweden

<sup>b</sup>Department of Physical Chemistry and Materials Science, University of Szeged, Rerrich B. square 1., H-6720 Szeged, Hungary

<sup>c</sup>Department of Chemistry, School of Engineering Science in Chemistry, Biotechnology and Health, KTH Royal Institute of Technology, Teknikringen 30, SE-10044 Stockholm, Sweden

<sup>d</sup>Nouryon Pulp and Performance Chemicals AB, Färjevägen 1, SE 445-80 Bohus, Sweden

<sup>e</sup>Faculty of Science, Health, Education and Engineering, University of the Sunshine Coast, Sippy Dows Drive 90, Sippy Downs, Queensland 4556, Australia.

<sup>f</sup>School of Chemistry and Molecular Biosciences, The University of Queensland, Cooper Rd 68, Brisbane, Queensland 4072, Australia.

**\*Corresponding authors:** Balázs Endrődi ([endrodib@chem.u-szeged.hu](mailto:endrodib@chem.u-szeged.hu)) &

Ann Cornell ([amco@kth.se](mailto:amco@kth.se))

*Number of pages: 8*

*Number of Figures: 8*

*Number of Table(s): 1*

## MnO<sub>x</sub>/Ti electrode formation by the thermal decomposition of Mn(NO<sub>3</sub>)<sub>2</sub> precursor

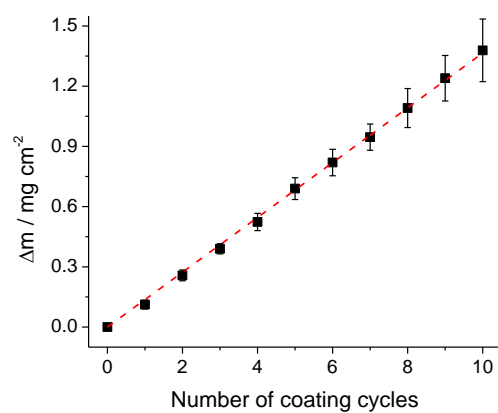

**Figure S1.** The cumulative weight increase during the subsequent layer coating cycles (brush-coating  $V \approx 50 \mu\text{l}$  Mn(NO<sub>3</sub>)<sub>2</sub> precursor, drying at  $T_1 = 60^\circ\text{C}$  for  $t_1 = 10$  min, annealing at  $T_2 = 400^\circ\text{C}$  for  $t_2 = 10$  min).

## SR-XPS study of the electrode composition

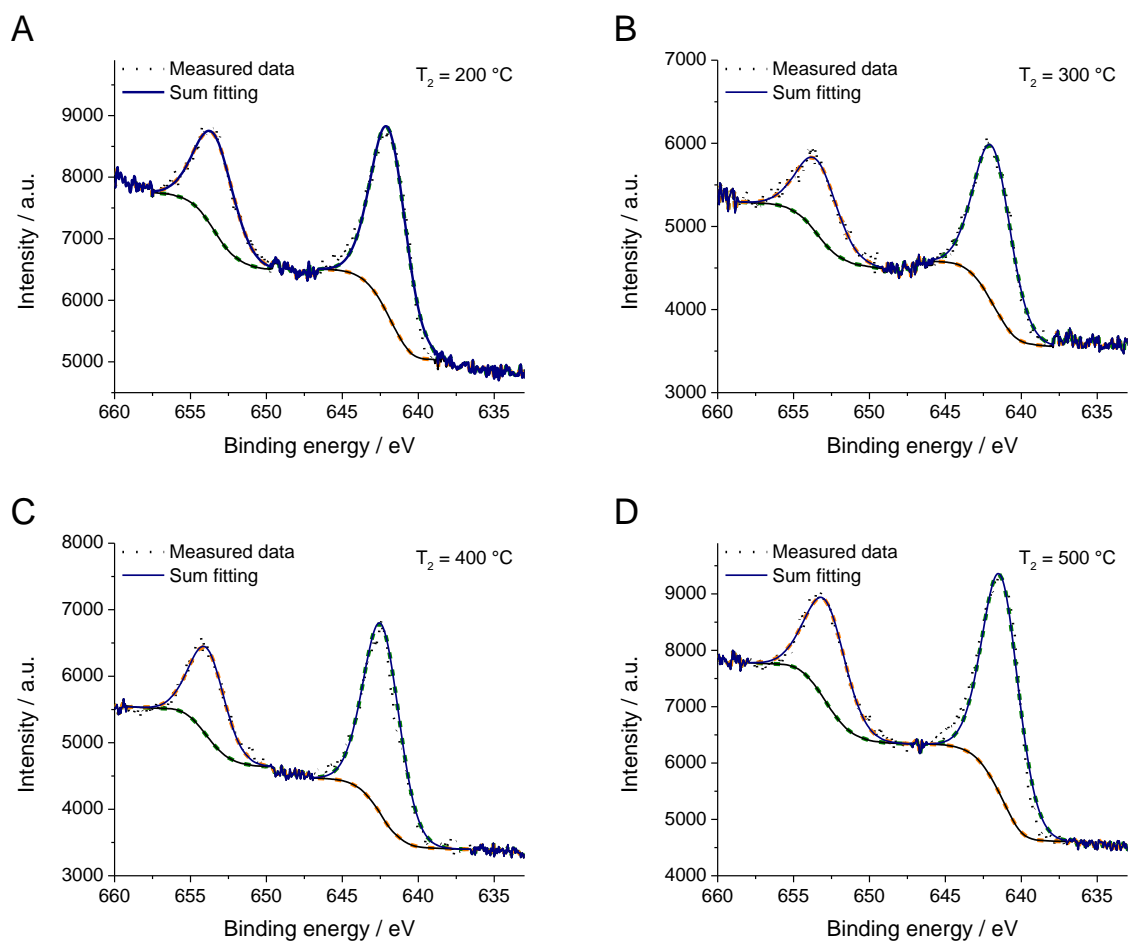

**Figure S2.** SR-XPS Mn 2p spectra for the MnO<sub>x</sub>/Ti electrodes formed at different annealing temperatures (1.5 mg cm<sup>-2</sup> MnO<sub>x</sub> loading): (A) 200 °C, (B) 300 °C, (C) 400 °C and (D) 500 °C.

**Table S1.** O-to-Mn atomic ratios in the MnO<sub>x</sub> samples formed at different annealing temperatures (1.5 mg cm<sup>-2</sup> MnO<sub>x</sub> loading), as determined from the SR-XPS measurements, as illustrated in **Figure S2**.

| Annealing Temperature | Electrochemical Polarization | O-to-Mn ratio |
|-----------------------|------------------------------|---------------|
| 200 °C                | No                           | 1.98          |
| 300 °C                | No                           | 1.76          |
| 400 °C                | No                           | 1.78          |
| 500 °C                | No                           | 1.76          |
| 400 °C                | Yes                          | 2.00          |
| 500 °C                | Yes                          | 2.15          |

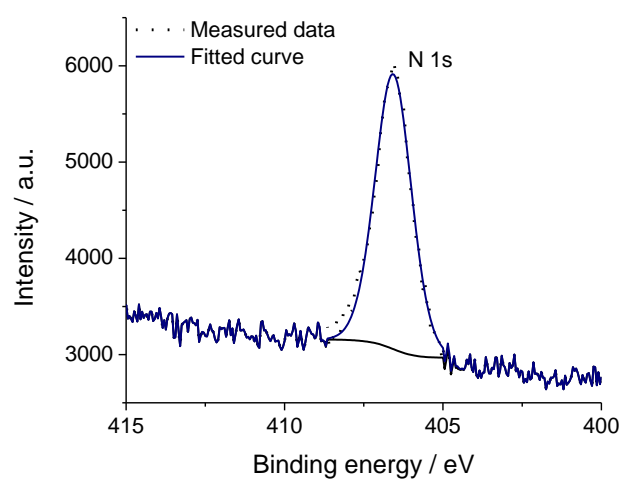

**Figure S3.** SR-XPS spectrum of a MnO<sub>x</sub>-200-1.5 electrode, shown for the N 1s binding energy region.

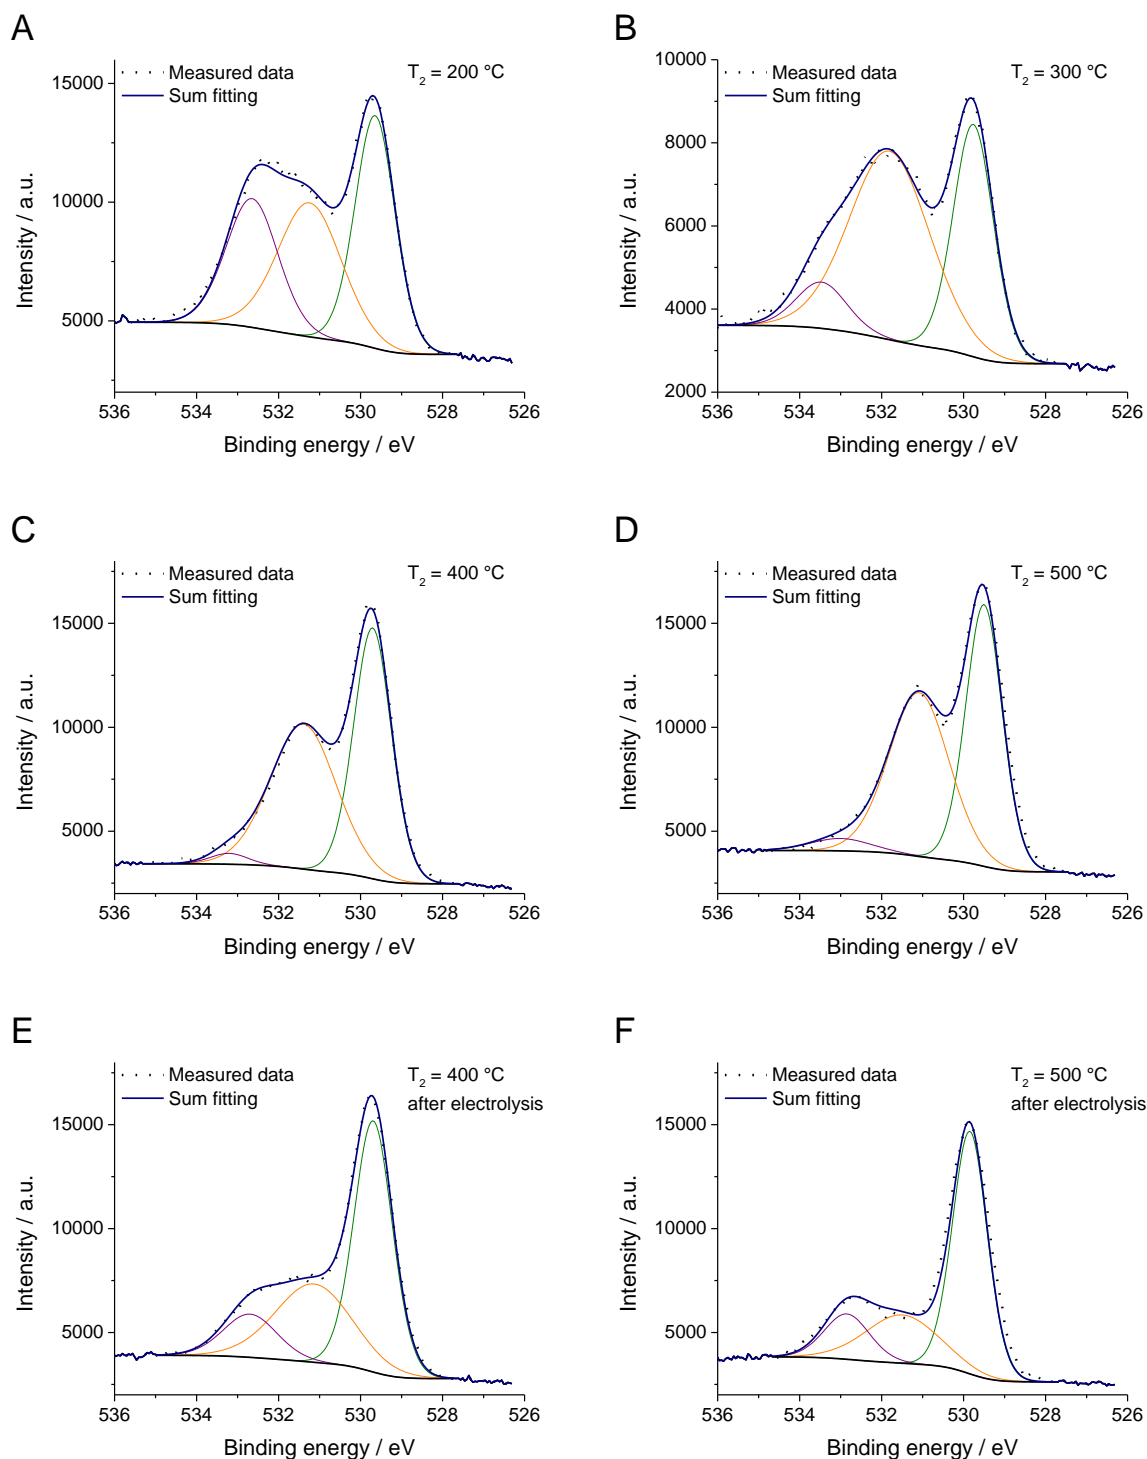

**Figure S4.** SR-XPS O 1s spectra of the MnO<sub>x</sub>/Ti electrodes formed at different annealing temperature ( $1.5\text{ mg cm}^{-2}$  MnO<sub>x</sub> loading): (A)  $200\text{ }^{\circ}\text{C}$ , (B)  $300\text{ }^{\circ}\text{C}$ , (C)  $400\text{ }^{\circ}\text{C}$ , (D)  $500\text{ }^{\circ}\text{C}$ , (E)  $400\text{ }^{\circ}\text{C}$  after subjecting to electrochemical polarization, and (F)  $500\text{ }^{\circ}\text{C}$  after subjecting to electrochemical polarization in an 80 mM NaOCl and 2 M NaCl containing solution.

### Morphology of the $\text{MnO}_x/\text{Ti}$ electrodes formed at different annealing temperatures

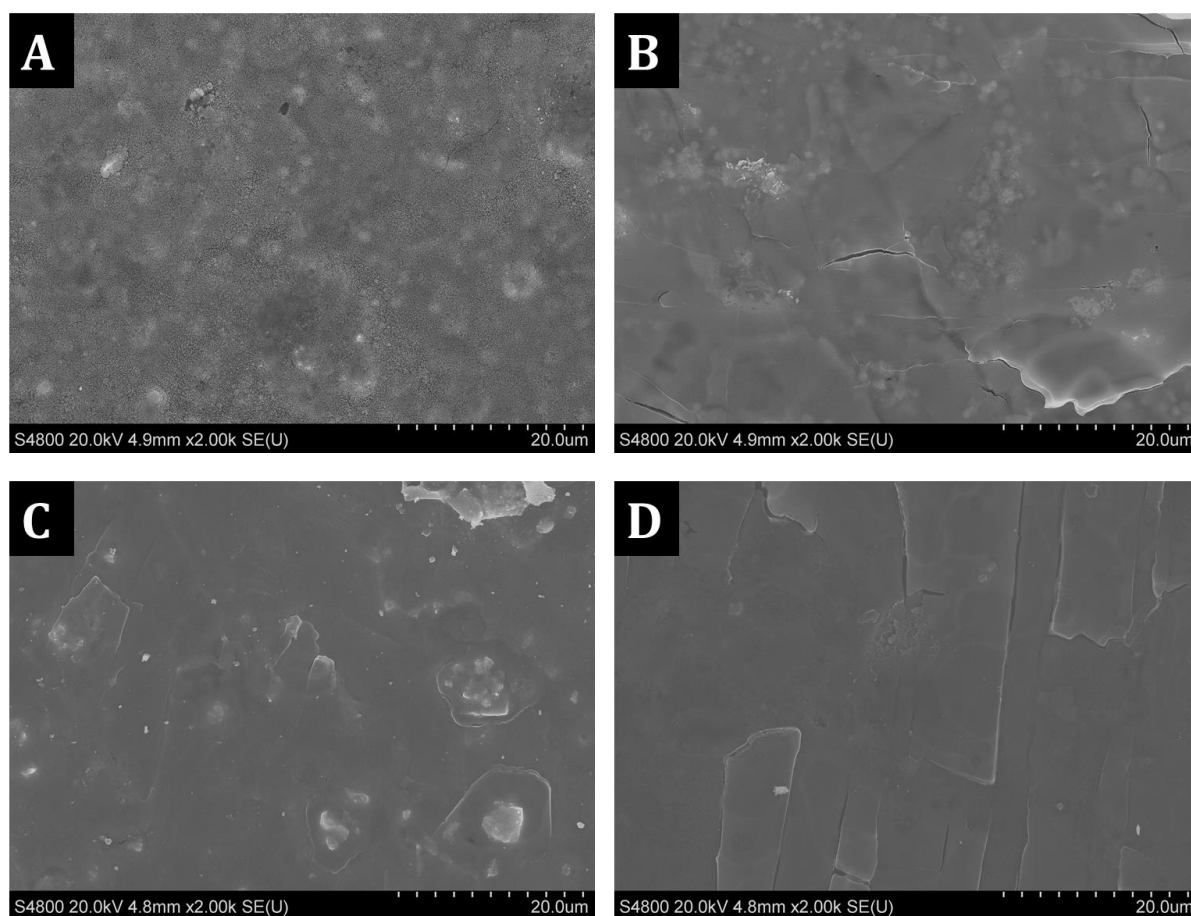

**Figure S5.** SEM images taken of the  $\text{MnO}_x/\text{Ti}$  electrodes formed at different annealing temperatures (A)  $T_2 = 200\text{ }^\circ\text{C}$ , (B)  $T_2 = 300\text{ }^\circ\text{C}$  (C),  $T_2 = 400\text{ }^\circ\text{C}$  and (D)  $T_2 = 500\text{ }^\circ\text{C}$ , with the same catalyst loading ( $\sim 1.5\text{ mg cm}^{-2}$ ).

## Electrochemical characterization of the formed MnO<sub>x</sub>/Ti electrodes

The relative electrochemically active surface area of the formed MnO<sub>x</sub> layers was addressed by cyclic voltammetric measurements, in a potential window where no Faradaic reactions occur (**Figure S6A**), while the resistance of the layers was studied by electrochemical impedance spectroscopy (**Figure S6B**) performed at an electrode potential ( $E = +300$  mV) in this range.

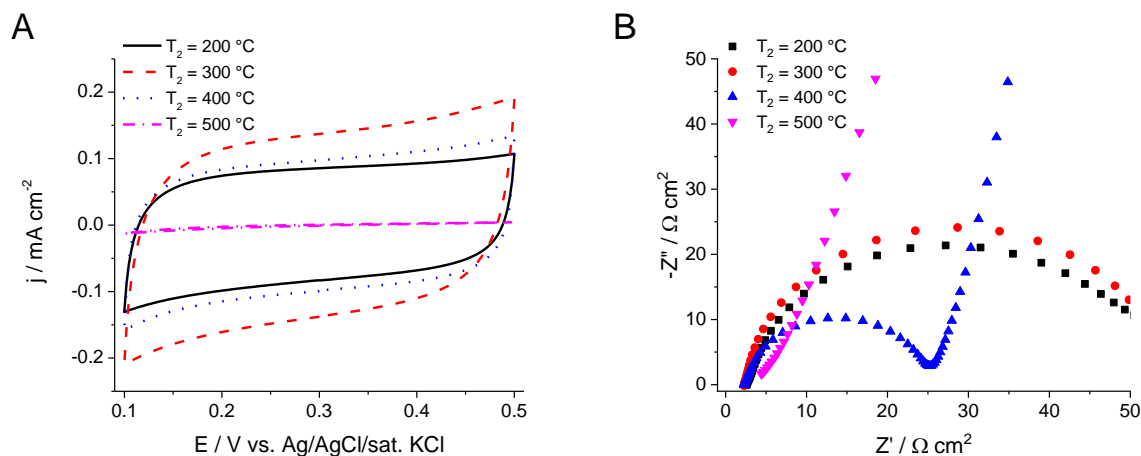

**Figure S6.** (A) Cyclic voltammograms ( $\nu = 10$  mV s<sup>-1</sup>) of MnO<sub>x</sub>/Ti electrodes with 1.5 mg cm<sup>-2</sup> MnO<sub>x</sub> amount, prepared by applying different annealing temperatures. (B) EIS spectra of the same layers as in (A), recorded at  $E = +300$  mV. Both set of experiments were performed in argon purged 2 M NaCl solution.

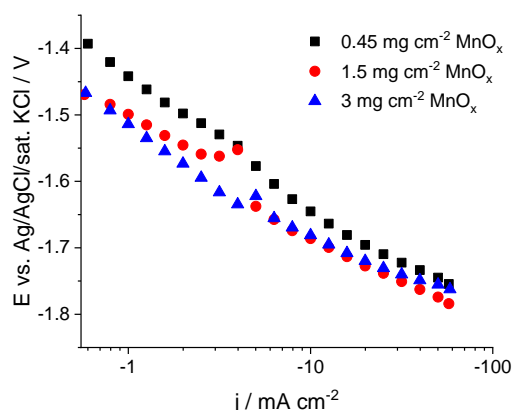

**Figure S7.** IR-corrected polarization curves with MnO<sub>x</sub>/Ti electrodes prepared at  $T = 500$  °C annealing temperatures with different MnO<sub>x</sub> amounts. The measurements were performed in N<sub>2</sub> purged 2 M NaCl solution.

**Effect of catalyst loading on the morphology of the  $\text{MnO}_x/\text{Ti}$  electrodes formed at 500 °C annealing temperature.**

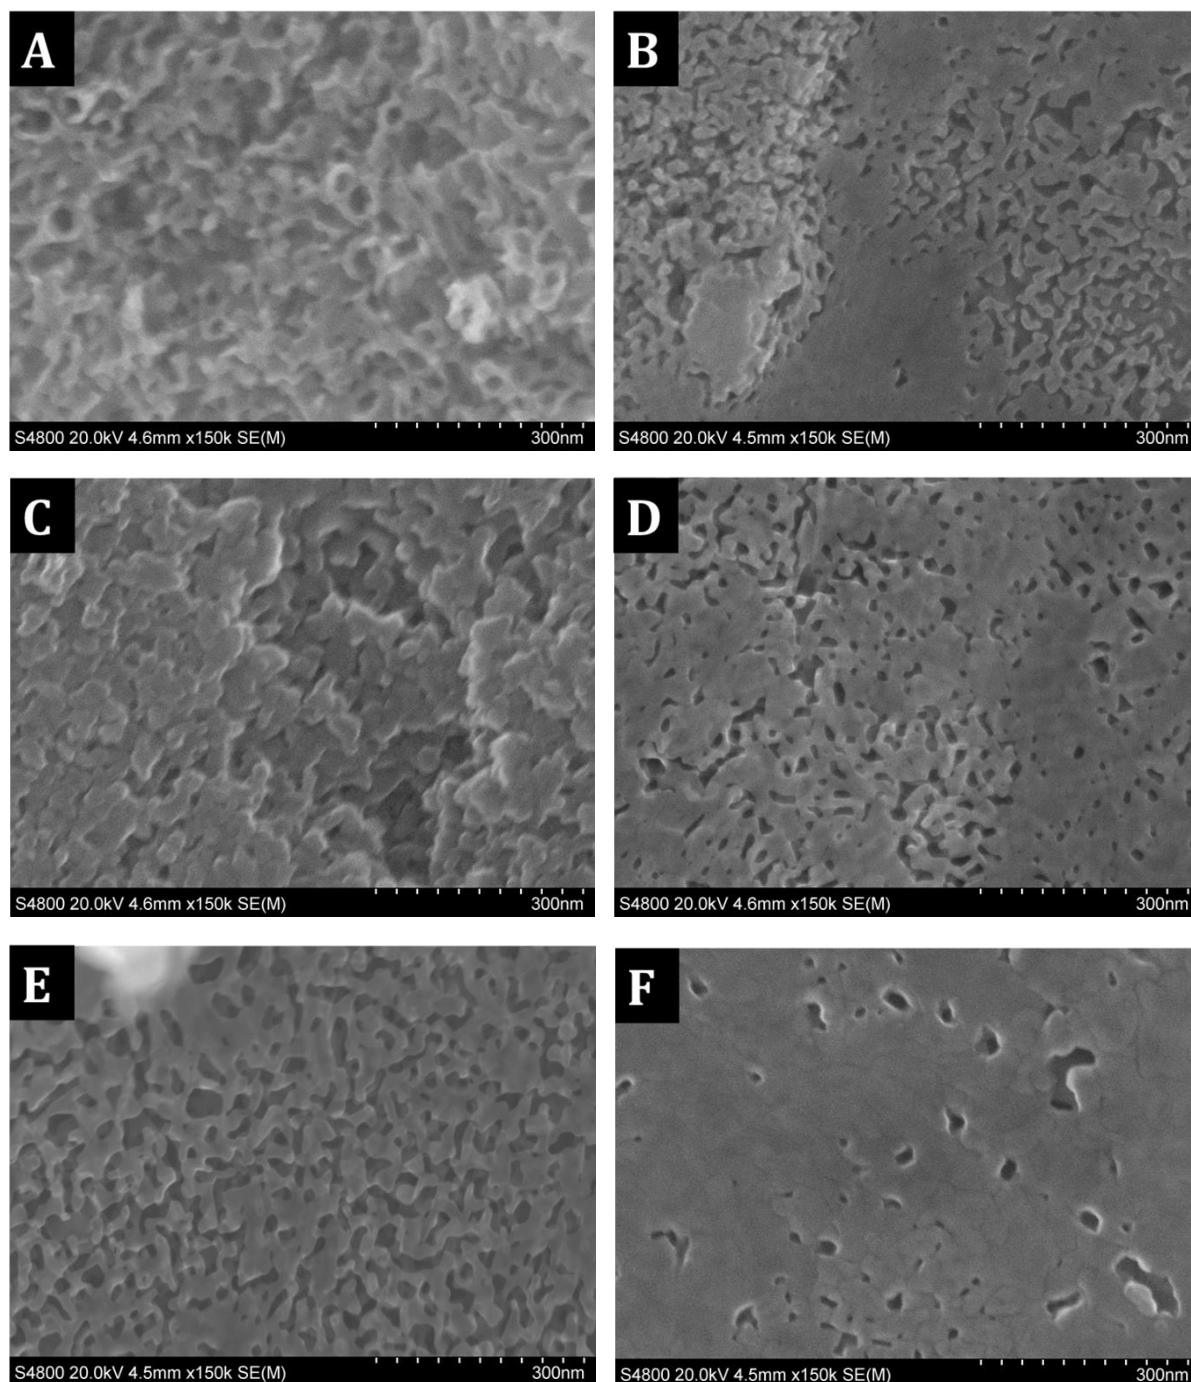

**Figure S8.** SEM images of  $\text{MnO}_x/\text{Ti}$  electrodes formed at  $T_2 = 500$  °C annealing temperature, with increasing  $\text{MnO}_x$  loading from (A) to (F) (0.15, 0.45, 0.75, 1.5, 2.25 and 3.0  $\text{mg cm}^{-2}$ , accordingly).
